# Supplementary material
Source: publisher figshare collection journal article supplement (https://frontiersin.figshare.com/ndownloader/files/13649042)
Supplement: Supplementary file [file 13649042]

Supplemental Table S2: Order-Level Diversity (%) Pyrosequencing Data\*

| Domain   | Phylum                | Class                                   | Order                      | Sample Site |        |         |      |       |        |         |
|----------|-----------------------|-----------------------------------------|----------------------------|-------------|--------|---------|------|-------|--------|---------|
|          |                       |                                         |                            | WCL I       | WCL II | WCL III | PCTL | STR I | STR II | STR III |
| Archaea  | <i>Euryarchaeota</i>  | <i>Halobacteria</i>                     |                            |             |        |         |      |       |        |         |
|          |                       |                                         | <i>Halobacteriales</i>     | 0.14        | 0.35   | 0.44    | 0.00 | 0.02  | 0.00   | 0.01    |
|          |                       | <i>Thermoplasmata</i>                   | <i>Thermoplasmatales</i>   | 0.29        | 0.41   | 0.41    | 0.00 | 0.00  | 0.14   | 0.03    |
|          | <i>Thamarchaeota</i>  |                                         | Unclassified               | 0.29        | 0.21   | 0.32    | 0.00 | 0.00  | 0.00   | 0.00    |
|          |                       | Marine Group I                          | Unclassified               | 0.83        | 2.48   | 0.90    | 0.00 | 0.17  | 0.61   | 0.00    |
|          |                       | Soil Crenarchaeotic Group SCG           | Unclassified               | 0.13        | 0.00   | 0.05    | 0.00 | 0.04  | 0.00   | 0.10    |
|          |                       | South African Gold Mine Gp 1 (SAGMCG-1) | Unclassified               | 0.43        | 1.10   | 1.68    | 0.00 | 0.02  | 0.00   | 0.15    |
|          |                       | Unclassified                            |                            | 0.31        | 0.48   | 0.65    | 0.00 | 0.00  | 0.00   | 0.00    |
|          |                       |                                         |                            |             |        |         |      |       |        |         |
|          |                       |                                         |                            |             |        |         |      |       |        |         |
|          |                       |                                         |                            |             |        |         |      |       |        |         |
|          |                       |                                         |                            |             |        |         |      |       |        |         |
|          |                       |                                         |                            |             |        |         |      |       |        |         |
| Bacteria | <i>Acidobacteria</i>  | <i>Acidobacteria</i>                    | <i>Acidobacteriales</i>    | 0.00        | 0.02   | 0.00    | 0.00 | 0.19  | 0.07   | 0.11    |
|          |                       |                                         | Subgroup 17                | 0.05        | 0.22   | 0.00    | 0.00 | 0.17  | 0.00   | 0.19    |
|          |                       |                                         | Subgroup 25                | 0.00        | 0.00   | 0.00    | 0.00 | 0.17  | 0.00   | 0.02    |
|          |                       |                                         | Subgroup 3                 | 0.38        | 0.07   | 0.18    | 0.00 | 0.10  | 0.11   | 0.07    |
|          |                       |                                         | Subgroup 4                 | 0.05        | 0.12   | 0.00    | 0.00 | 0.76  | 1.02   | 0.84    |
|          |                       |                                         | Subgroup 6                 | 0.02        | 0.03   | 0.00    | 0.00 | 0.13  | 0.26   | 0.45    |
|          |                       |                                         |                            |             |        |         |      |       |        |         |
|          | <i>Actinobacteria</i> | <i>Acidimicrobiia</i>                   |                            |             |        |         |      |       |        | 0.00    |
|          |                       |                                         | <i>Acidimicrobiales</i>    | 0.09        | 0.45   | 0.16    | 0.00 | 0.25  | 0.00   | 0.35    |
|          |                       | <i>Actinobacteria</i>                   | <i>Actinomycetales</i>     | 2.16        | 3.00   | 2.79    | 0.00 | 0.00  | 0.00   | 0.00    |
|          |                       |                                         | <i>Corynebacteriales</i>   | 0.67        | 0.26   | 0.07    | 0.08 | 0.21  | 1.16   | 0.11    |
|          |                       |                                         | <i>Frankiales</i>          | 0.00        | 0.00   | 0.00    | 0.00 | 0.06  | 0.33   | 0.25    |
|          |                       |                                         | <i>Glycomycetales</i>      | 0.02        | 0.03   | 0.39    | 0.00 | 0.00  | 0.00   | 0.00    |
|          |                       |                                         | <i>Kineosporiales</i>      | 0.00        | 0.00   | 0.00    | 0.00 | 0.00  | 0.05   | 0.13    |
|          |                       |                                         | <i>Micrococcales</i>       | 3.50        | 3.78   | 3.02    | 0.13 | 0.21  | 0.00   | 0.66    |
|          |                       |                                         | <i>Micromonosporales</i>   | 0.00        | 0.03   | 0.00    | 1.78 | 0.11  | 0.67   | 0.16    |
|          |                       |                                         | <i>Propionibacteriales</i> | 1.12        | 0.91   | 1.31    | 0.40 | 0.19  | 0.00   | 0.18    |
|          |                       |                                         | <i>Pseudonocardiales</i>   | 0.45        | 0.60   | 0.71    | 0.00 | 0.55  | 0.04   | 0.85    |
|          |                       |                                         | <i>Streptomycetales</i>    | 0.09        | 0.00   | 0.18    | 0.08 | 0.04  | 0.00   | 0.12    |
|          |                       |                                         | <i>Streptosporangiales</i> | 0.27        | 0.00   | 0.09    | 0.00 | 0.02  | 0.00   | 0.01    |

|                 |                 |                     |                    |      |      |      |      |      |      |
|-----------------|-----------------|---------------------|--------------------|------|------|------|------|------|------|
| MB-A2-108       | Nitriliruptoria | Unclassified        | 0.07               | 0.12 | 0.00 | 0.00 | 0.19 | 0.58 | 0.27 |
|                 |                 | Euzebyales          | 0.11               | 0.05 | 0.14 | 0.00 | 0.06 | 0.00 | 0.00 |
|                 |                 | Nitriliruptorales   | 0.11               | 0.45 | 0.37 | 0.00 | 0.00 | 0.00 | 0.00 |
|                 | TakashiAC-B11   | Unclassified        | 0.00               | 0.00 | 0.00 | 0.00 | 0.21 | 0.28 | 0.41 |
|                 | Thermoleophilia | Gaiellales          | 0.02               | 0.07 | 0.00 | 0.00 | 0.13 | 0.04 | 0.13 |
|                 |                 | Solirubrobacterales | 0.00               | 0.12 | 0.00 | 0.00 | 0.11 | 0.09 | 0.20 |
|                 |                 |                     |                    |      |      |      |      |      |      |
| Armatimonadetes |                 |                     |                    |      |      |      |      |      |      |
|                 | Armatimonadia   | Unclassified        | 0.02               | 0.09 | 0.00 | 0.00 | 0.06 | 0.42 | 0.11 |
|                 |                 |                     |                    |      |      |      |      |      |      |
| BD1-5           |                 |                     |                    |      |      |      |      |      |      |
|                 | Unclassified    | 0.47                | 0.38               | 0.25 | 0.00 | 0.00 | 0.00 | 0.00 |      |
| Bacteroidetes   |                 |                     |                    |      |      |      |      |      |      |
|                 | Bacteroidia     | Bacteroidales       | 2.04               | 1.55 | 0.67 | 0.00 | 0.00 | 0.00 | 0.04 |
|                 |                 | Cytophagia          | Cytophagales       | 0.11 | 0.28 | 0.21 | 0.00 | 0.32 | 0.05 |
|                 |                 | Order III           | 0.05               | 0.17 | 0.25 | 0.00 | 0.00 | 0.00 | 0.00 |
|                 | Flavobacteriia  | Flavobacteriales    | 0.18               | 0.74 | 0.62 | 0.00 | 0.49 | 0.63 | 0.74 |
|                 |                 | Sphingobacteriia    | Sphingobacteriales | 0.22 | 0.88 | 0.46 | 0.00 | 1.90 | 0.89 |
|                 |                 |                     |                    |      |      |      |      |      |      |
|                 | ODI             |                     | Unclassified       | 0.20 | 0.02 | 0.48 | 0.00 | 0.00 | 0.00 |
| Chlamydiae      |                 |                     |                    |      |      |      |      |      |      |
|                 | Chlamydiae      | Chlamydiales        | 0.27               | 0.17 | 0.05 | 0.00 | 0.13 | 0.05 | 0.23 |
|                 |                 |                     |                    |      |      |      |      |      |      |
| Chlorobi        |                 |                     |                    |      |      |      |      |      |      |
|                 | Chlorobia       | Chlorobiales        | 0.00               | 0.00 | 0.00 | 0.00 | 0.00 | 0.26 | 0.03 |
|                 |                 |                     |                    |      |      |      |      |      |      |
|                 | Ignavibacteria  | Ignavibacteriales   | 0.11               | 0.10 | 0.14 | 0.00 | 0.00 | 0.00 | 0.01 |
| Chloroflexi     |                 |                     |                    |      |      |      |      |      |      |
|                 | Anaerolineae    | Anaerolineales      | 0.09               | 0.31 | 0.12 | 0.00 | 0.67 | 1.09 | 1.17 |
|                 | Chloroflexia    | Chloroflexales      | 0.00               | 0.00 | 0.00 | 0.00 | 0.08 | 0.00 | 0.15 |
|                 | Gitt-GS-136     | Unclassified        | 0.51               | 2.31 | 2.70 | 0.00 | 0.74 | 0.32 | 1.03 |
|                 |                 |                     |                    |      |      |      |      |      |      |

|                     |                  |                                |      |      |      |       |      |      |      |
|---------------------|------------------|--------------------------------|------|------|------|-------|------|------|------|
|                     | JG30-KF-CM66     |                                |      |      |      |       |      |      |      |
|                     |                  | Unclassified                   | 1.23 | 1.40 | 2.21 | 0.00  | 0.19 | 0.00 | 0.43 |
|                     | S085             |                                |      |      |      |       |      |      |      |
|                     |                  | Unclassified                   | 0.72 | 0.88 | 0.00 | 0.05  | 0.25 | 0.05 | 0.43 |
|                     | SAR202`          |                                |      |      |      |       |      |      |      |
|                     |                  | Unclassified                   | 7.49 | 5.88 | 7.03 | 0.00  | 0.30 | 0.44 | 0.38 |
|                     | TK10             |                                |      |      |      |       |      |      |      |
|                     |                  | Unclassified                   | 0.04 | 0.36 | 0.18 | 0.00  | 0.21 | 0.95 | 0.73 |
|                     |                  |                                | 0.23 | 0.26 | 2.07 | 0.00  | 0.00 | 0.00 | 0.00 |
|                     |                  |                                | 0.20 | 0.02 | 0.16 | 0.00  | 0.00 | 0.00 | 0.00 |
|                     | Unclassified     |                                |      |      |      |       |      |      |      |
|                     |                  |                                | 0.43 | 0.28 | 2.24 | 0.00  | 0.00 | 0.00 | 0.00 |
|                     |                  |                                |      |      |      |       |      |      |      |
| Cyanobacteria       |                  |                                |      |      |      |       |      |      |      |
|                     | Melainabacteria  |                                |      |      |      |       |      |      |      |
|                     |                  | Caenarcaniphilales             | 0.05 | 0.19 | 0.07 | 0.00  | 0.02 | 0.00 | 0.07 |
|                     |                  |                                |      |      |      |       |      |      |      |
| Deferribacteres     |                  |                                |      |      |      |       |      |      |      |
|                     | Deferribacteres  |                                |      |      |      |       |      |      |      |
|                     |                  | Deferribacterales              | 0.05 | 0.03 | 0.14 | 0.00  | 0.00 | 0.00 | 0.00 |
|                     |                  |                                |      |      |      |       |      |      |      |
| Deinococcus-Thermus |                  |                                |      |      |      |       |      |      |      |
|                     | Deinococci       |                                |      |      |      |       |      |      |      |
|                     |                  | Deinococcales                  | 0.00 | 0.00 | 0.05 | 0.00  | 0.42 | 0.11 | 0.43 |
|                     |                  |                                |      |      |      |       |      |      |      |
| Elusimicrobia       |                  |                                |      |      |      |       |      |      |      |
|                     | Elusimicrobia    |                                |      |      |      |       |      |      |      |
|                     |                  | FCPU453                        | 0.00 | 0.05 | 0.25 | 0.00  | 0.00 | 0.00 | 0.00 |
|                     |                  | Lineage IIc                    | 0.14 | 0.28 | 0.09 | 0.00  | 0.00 | 0.00 | 0.00 |
|                     |                  | Lineage IV                     | 0.07 | 0.02 | 0.65 | 0.00  | 0.00 | 0.00 | 0.00 |
|                     |                  | MVP-88                         | 0.02 | 0.17 | 0.00 | 0.00  | 0.00 | 0.00 | 0.00 |
|                     |                  |                                |      |      |      |       |      |      |      |
| Firmicutes          |                  |                                |      |      |      |       |      |      |      |
|                     | Bacilli          |                                |      |      |      |       |      |      |      |
|                     |                  | Bacillales                     | 3.57 | 5.02 | 4.45 | 0.70  | 0.72 | 0.00 | 0.88 |
|                     |                  | Lactobacillales                | 6.01 | 6.18 | 6.66 | 37.26 | 0.34 | 0.28 | 0.37 |
|                     | Clostridia       |                                |      |      |      |       |      |      |      |
|                     |                  | Clostridiales                  | 0.14 | 0.05 | 0.02 | 0.00  | 0.10 | 0.04 | 0.10 |
|                     | Erysipelotrichia |                                |      |      |      |       |      |      |      |
|                     |                  | Erysipelotrichales             | 0.00 | 0.00 | 0.12 | 0.00  | 0.00 | 0.00 | 0.00 |
|                     | Negativicutes    |                                |      |      |      |       |      |      |      |
|                     |                  | Selenomonadales                | 3.82 | 4.73 | 1.64 | 0.00  | 0.00 | 0.00 | 0.00 |
|                     |                  |                                |      |      |      |       |      |      |      |
| Fusobacteri         |                  |                                |      |      |      |       |      |      |      |
|                     | Fusobacteriia    |                                |      |      |      |       |      |      |      |
|                     |                  | Fusobacteriales                | 3.54 | 6.40 | 6.98 | 0.00  | 0.00 | 0.00 | 0.00 |
|                     |                  |                                |      |      |      |       |      |      |      |
| Gemmatimonadetes    |                  |                                |      |      |      |       |      |      |      |
|                     | Gemmatimonadetes |                                |      |      |      |       |      |      |      |
|                     |                  | AT425-EubC11 terrestrial group | 0.00 | 0.00 | 0.02 | 0.00  | 0.02 | 0.00 | 0.13 |
|                     |                  | Gemmatimonadales               | 0.13 | 0.21 | 0.35 | 0.00  | 0.61 | 0.30 | 0.54 |

|                |                     |                         |      |      |      |      |      |      |      |
|----------------|---------------------|-------------------------|------|------|------|------|------|------|------|
|                |                     | S0134 terrestrial group | 0.00 | 0.24 | 0.12 | 0.00 | 0.08 | 0.00 | 0.09 |
| JL-ETNP-Z39    |                     |                         |      |      |      |      |      |      |      |
|                | Unclassified        |                         | 0.00 | 0.00 | 0.00 | 0.00 | 0.04 | 0.00 | 0.12 |
| NPL-UPA2       |                     |                         |      |      |      |      |      |      |      |
|                | Unclassified        |                         | 0.51 | 0.74 | 1.29 | 0.00 | 0.29 | 1.30 | 0.67 |
| Nitrospirae    |                     |                         |      |      |      |      |      |      |      |
|                | Nitrospira          |                         |      |      |      |      |      |      |      |
|                |                     | Nitrospirales           | 1.86 | 2.48 | 1.41 | 0.00 | 0.80 | 0.26 | 0.73 |
| Omnitrophica   |                     |                         |      |      |      |      |      |      |      |
|                | Unclassified        |                         | 5.63 | 5.92 | 8.41 | 0.00 | 0.74 | 1.16 | 1.32 |
| Planctomycetes |                     |                         |      |      |      |      |      |      |      |
|                | BD7-11              |                         |      |      |      |      |      |      |      |
|                |                     | Unclassified            | 0.04 | 0.21 | 0.00 | 0.00 | 0.00 | 0.00 | 0.13 |
|                | OM190               |                         |      |      |      |      |      |      |      |
|                |                     | Unclassified            | 0.60 | 0.74 | 0.00 | 0.00 | 0.36 | 0.00 | 0.23 |
|                | Phycisphaerae       |                         |      |      |      |      |      |      |      |
|                |                     | CCM11a                  | 0.16 | 0.26 | 0.48 | 0.00 | 0.00 | 0.18 | 0.02 |
|                |                     | Phycisphaerales         | 0.00 | 0.12 | 0.00 | 0.00 | 0.17 | 0.67 | 0.30 |
|                |                     | WD2101 soil group       | 0.00 | 0.00 | 0.00 | 0.00 | 0.30 | 0.00 | 0.48 |
|                |                     | mle1-8                  | 0.00 | 0.00 | 0.00 | 0.00 | 0.00 | 0.00 | 0.02 |
|                | Pla4 lineage        |                         |      |      |      |      |      |      |      |
|                |                     | Unclassified            | 1.48 | 1.26 | 2.24 | 0.00 | 0.02 | 0.00 | 0.12 |
|                | Planctomycetacia    |                         |      |      |      |      |      |      |      |
|                |                     | Planctomycetales        | 0.63 | 1.52 | 0.53 | 0.00 | 2.34 | 4.23 | 4.76 |
| Proteobacteria |                     |                         |      |      |      |      |      |      |      |
|                | Alphaproteobacteria |                         |      |      |      |      |      |      |      |
|                |                     | Caulobacteriales        | 0.05 | 0.03 | 0.07 | 0.00 | 0.40 | 0.37 | 0.37 |
|                |                     | Rhizobiales             | 0.31 | 0.17 | 0.30 | 0.25 | 0.13 | 0.28 | 0.36 |
|                |                     | Rhodospirillales        | 0.18 | 0.09 | 0.02 | 0.00 | 0.06 | 0.09 | 0.15 |
|                |                     | Rickettsiales           | 0.25 | 0.03 | 0.00 | 0.00 | 0.02 | 0.07 | 0.00 |
|                |                     | Sphingomonadales        | 0.49 | 0.09 | 0.00 | 0.00 | 1.29 | 1.67 | 1.51 |
|                | Betaproteobacteria  |                         |      |      |      |      |      |      |      |
|                |                     | Burkholderiales         | 0.22 | 0.43 | 0.00 | 0.08 | 4.85 | 4.08 | 3.59 |
|                |                     | Neisseriales            | 6.01 | 7.59 | 2.72 | 6.23 | 0.30 | 0.00 | 0.07 |
|                |                     | Nitrosomonadales        | 0.40 | 0.36 | 0.25 | 0.00 | 0.10 | 0.00 | 0.37 |
|                |                     | Rhodocyclales           | 0.00 | 0.00 | 0.00 | 0.00 | 0.11 | 0.49 | 0.66 |
|                |                     | TRA3-20                 | 0.00 | 0.16 | 0.09 | 0.00 | 0.00 | 0.00 | 0.02 |
|                | Deltaproteobacteria |                         |      |      |      |      |      |      |      |
|                |                     | Bdellovibrionales       | 0.20 | 0.33 | 0.21 | 0.00 | 0.04 | 0.00 | 0.12 |
|                |                     | Desulfobacteriales      | 0.16 | 0.09 | 0.09 | 0.00 | 0.06 | 0.09 | 0.07 |
|                |                     | Desulfurellales         | 0.81 | 0.69 | 0.44 | 0.00 | 0.29 | 0.00 | 0.38 |
|                |                     | Desulfuromonadales      | 0.40 | 0.10 | 0.85 | 0.00 | 0.00 | 0.00 | 0.01 |
|                |                     | GR-WP33-30              | 0.22 | 0.24 | 0.37 | 0.00 | 0.08 | 0.00 | 0.30 |
|                |                     | Myxococcales            | 4.27 | 3.81 | 2.90 | 0.00 | 2.76 | 2.88 | 2.34 |

|                              |                                       |       |      |      |       |              |              |              |
|------------------------------|---------------------------------------|-------|------|------|-------|--------------|--------------|--------------|
| <i>Epsilonproteobacteria</i> |                                       |       |      |      |       |              |              |              |
|                              | <i>Campylobacteriales</i>             | 0.27  | 0.10 | 0.00 | 0.00  | 0.00         | 0.00         | 0.00         |
| <i>Gammaproteobacteria</i>   |                                       |       |      |      |       |              |              |              |
|                              | <i>Acidithiobacillales</i>            | 0.01  | 0.02 | 0.00 | 0.00  | <b>61.68</b> | <b>58.73</b> | <b>48.26</b> |
|                              | <i>Alteromonadales</i>                | 0.49  | 0.98 | 1.01 | 5.37  | 0.11         | 0.09         | 0.20         |
|                              | <i>Chromatiales</i>                   | 1.52  | 2.09 | 3.64 | 0.00  | 0.00         | 0.00         | 0.11         |
|                              | <i>Enterobacteriales</i>              | 0.00  | 0.00 | 0.48 | 2.26  | 0.02         | 0.00         | 0.00         |
|                              | KI89A clade                           | 0.29  | 0.00 | 0.00 | 0.00  | 0.00         | 0.00         | 0.00         |
|                              | <i>Legionellales</i>                  | 0.67  | 0.45 | 0.83 | 35.50 | 0.13         | 1.17         | 0.45         |
|                              | NKB5                                  | 0.05  | 0.02 | 0.00 | 0.00  | 0.10         | 0.00         | 0.01         |
|                              | <i>Oceanospirillales</i>              | 0.00  | 0.00 | 0.18 | 7.03  | 0.06         | 0.00         | 0.10         |
|                              | PYR10d3                               | 0.00  | 0.00 | 0.00 | 0.00  | 0.30         | 0.00         | 0.01         |
|                              | <i>Pasteurellales</i>                 | 0.52  | 0.41 | 0.71 | 0.00  | 0.00         | 0.00         | 0.00         |
|                              | <i>Pseudomonadales</i>                | 18.36 | 4.16 | 4.75 | 0.00  | 0.49         | 0.81         | 1.16         |
|                              | <i>Thiotrichales</i>                  | 0.00  | 0.00 | 0.00 | 0.00  | 0.46         | 0.61         | 0.00         |
|                              | <i>Vibrionales</i>                    | 0.00  | 0.00 | 0.00 | 2.74  | 0.25         | 0.00         | 0.00         |
|                              | <i>Xanthomonadales</i>                | 4.46  | 3.16 | 4.68 | 0.00  | 3.22         | 4.07         | 3.29         |
|                              | <i>Unclassified</i>                   | 0.02  | 0.00 | 0.21 | 0.00  | 0.25         | 0.05         | 0.15         |
| <hr/>                        |                                       |       |      |      |       |              |              |              |
| SHA-109                      | Unclassified                          | 0.00  | 0.00 | 0.00 | 0.00  | 0.15         | 1.81         | 0.35         |
| <hr/>                        |                                       |       |      |      |       |              |              |              |
| <i>Thermotogae</i>           |                                       |       |      |      |       |              |              |              |
|                              | <i>Thermotogales</i>                  | 0.14  | 0.17 | 0.12 | 0.00  | 0.00         | 0.00         | 0.02         |
| <hr/>                        |                                       |       |      |      |       |              |              |              |
| <i>Verrucomicrobia</i>       |                                       |       |      |      |       |              |              |              |
|                              | <i>Opitutae</i>                       |       |      |      |       |              |              |              |
|                              | <i>Opitutales</i>                     | 0.09  | 0.14 | 0.00 | 0.00  | 0.10         | 0.00         | 0.47         |
|                              | <i>Spartobacteria</i>                 |       |      |      |       |              |              |              |
|                              | <i>Chthoniobacterales</i>             | 0.04  | 0.00 | 0.00 | 0.00  | 0.30         | 0.00         | 0.72         |
|                              | <i>Verrucomicrobia Incertae Sedis</i> |       |      |      |       |              |              |              |
|                              | Unclassified                          | 0.52  | 0.66 | 0.00 | 0.00  | 0.08         | 0.00         | 0.18         |
|                              |                                       | 0.00  | 0.00 | 0.02 | 0.00  | 3.71         | 2.77         | 6.81         |
| <hr/>                        |                                       |       |      |      |       |              |              |              |
| Unassigned                   |                                       | 4.04  | 4.55 | 7.26 | 0.00  | 0.70         | 0.58         | 1.51         |

\* Data only shown for representative OTUs above the 0.1% threshold
